# Supplementary material
Source: PubMed Central journal article supplement (PMC2729341)
Supplement: supp_136_13_2223__6.pdf [file supp_136_13_2223__6.pdf]

**Table S1. *glp-1(tn777ts)* mutants do not contain excess pachytene cells**

| Genotype                           | Classification of germ cell morphology using DAPI staining |            |           |          |
|------------------------------------|------------------------------------------------------------|------------|-----------|----------|
|                                    | Proliferation                                              | Transition | Pachytene | <i>n</i> |
| Wild type                          | 180±36                                                     | 85±33      | 297±57    | 20       |
| <i>glp-1(tn777ts)</i>              | 0                                                          | 16±9       | 131±34    | 21       |
| <i>fog-2(oz40)</i>                 | 151±39                                                     | 44±7       | 234±37    | 17       |
| <i>glp-1(tn777ts); fog-2(oz40)</i> | 0                                                          | 24±14      | 154±22    | 18       |

L4 larvae of the indicated genotypes were transferred from 15°C to 25°C and the cytology of germ cells was analyzed in fixed and DAPI-stained dissected gonad preparations at 16 hours post-L4. Photographic images of a z-series of each gonad arm were taken and the germ cells were counted and classified (diplotene, diakinesis are not presented here).
