# Supplementary material
Source: PubMed Central journal article supplement (PMC2729341)

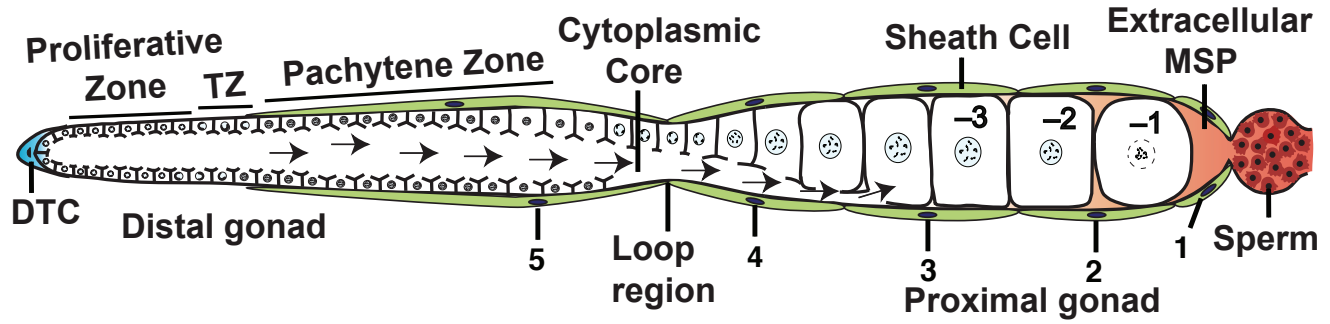

Supplement: supp_136_13_2223__1.pdf [file supp_136_13_2223__1.pdf]

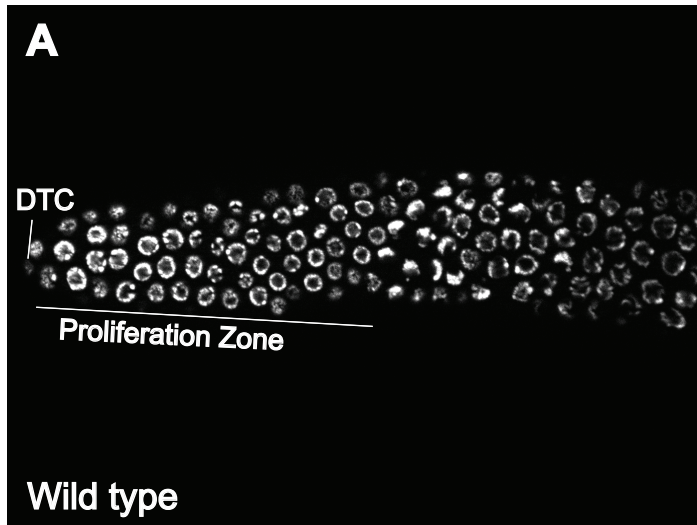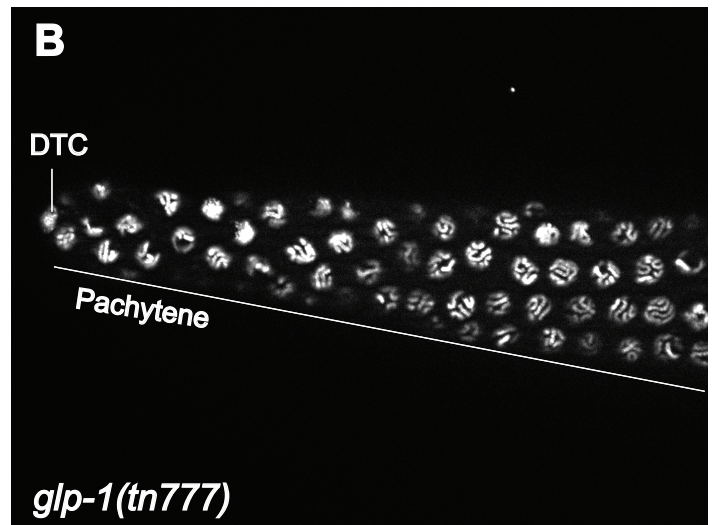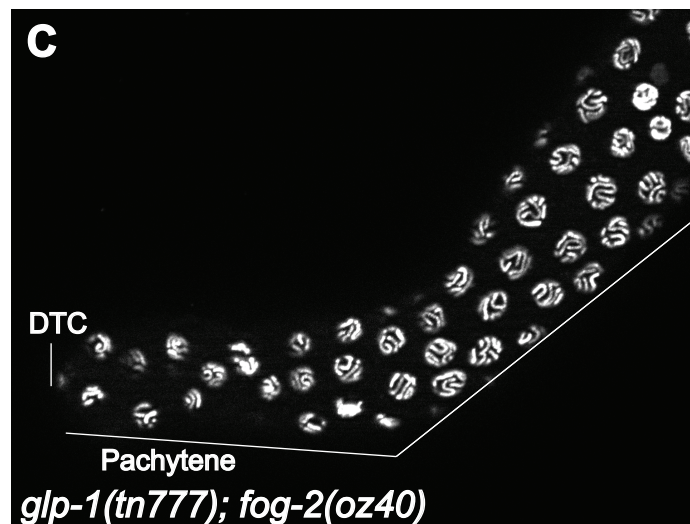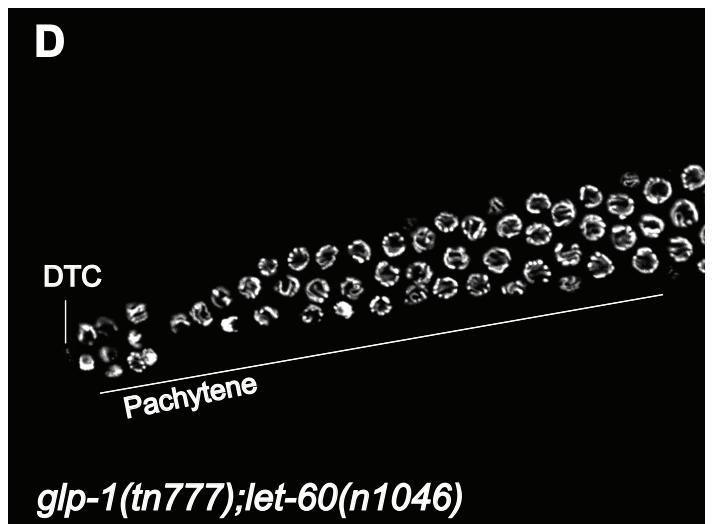

Supplement: supp_136_13_2223__2.pdf [file supp_136_13_2223__2.pdf]
